# Supplementary material
Source: PubMed Central journal article supplement (PMC4587447)
Supplement: supp_pp.15.00515_PP2015-00515R2_Supplemental_Material.pdf [file supp_pp.15.00515_PP2015-00515R2_Supplemental_Material.pdf]

# Supplemental Fig. S1

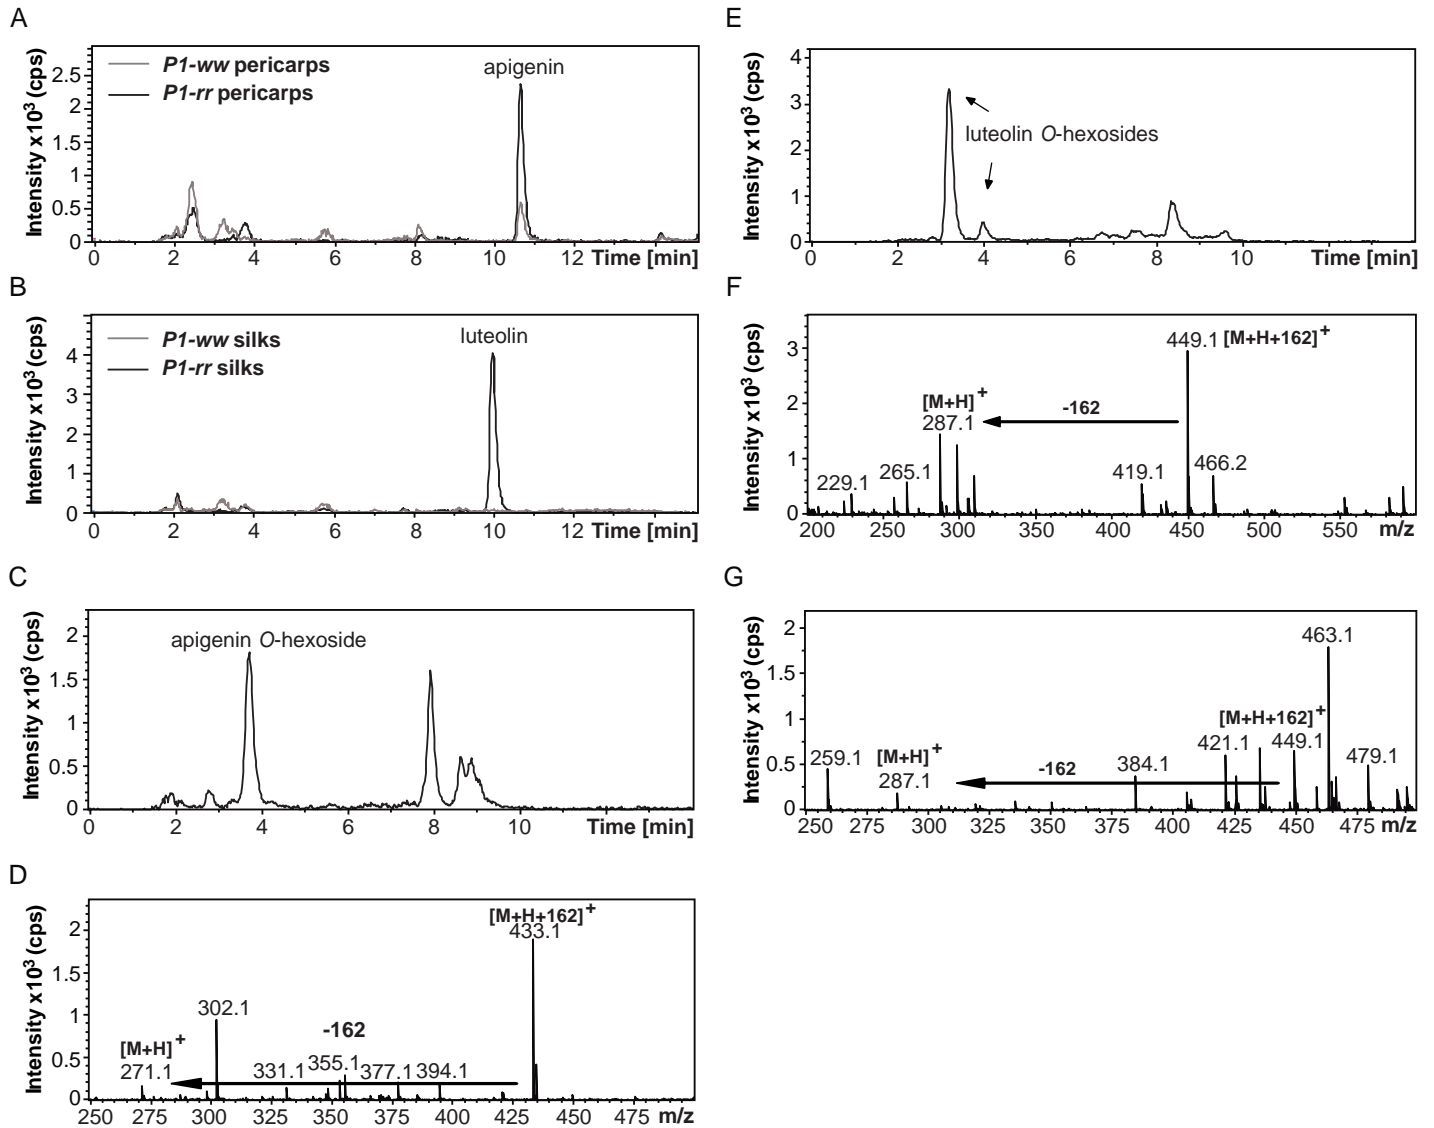

LC-MS/MS analysis of flavone-derived metabolites in maize pericarps (14 DAP) and silks expressing or not the *P1* gene (*P1-rr* and *P1-ww*). (A, B) Representative ion chromatograms for molecular ions of  $m/z = 271$  and  $287$  corresponding to apigenin and luteolin, respectively; detected in pericarps (A) and silks (B) expressing or not the *P1* gene. (C) Representative ion chromatograms for molecular ions of  $m/z = 433$  corresponding to apigenin O-hexoside detected in silks. (D) MS/MS fragmentation profile of apigenin O-hexoside detected in (C). (E) Representative ion chromatograms for molecular ions of  $m/z = 449$  corresponding to luteolin O-hexosides detected in pericarps expressing the *P1* gene. (F, G) MS/MS fragmentation profiles of luteolin O-hexosides detected in (D).

# Supplemental Fig. S2

## A

ZmFNSI-1 -----MAEHLST-AVHDTLPGSYVRPEPERPRLAEVVTGARIPVVDLGSPPDRGAVVAA 53  
Os10g39140 MAEAEQQHQQLLST-AVHDTMPGKYVRPESQRPRLDLVVSDARIPVVDLSPDRAAVVSA 59  
Os03g03034 -----MADQLIST-ADHDTLPGNYVRPEAQRPLADVLSASIPVVDLANPDRAKLVSQ 53  
AtDMR6 -----MAAKLISTGFRHTTLPENYVRPISDRPRLSEVSQLEDFPLIDLSSSTRSFLIQQ 54  
                  \*:\*\* \* \*: \* .\*\*\* .:\*\*\* \*           \*:\*\*...\*\* .:

ZmFNSI-1 VGDACRSHGFFQVNVHGIHAALVAAVMAAGRGFFRLPPEEKAKLYSDDPARKIRLSTSFN 113  
Os10g39140 VGDACRTHGFFQVNVHGIHAALIASVMEVGREFFRLPAEEKAKLYSDDPARKIRLSTSFN 119  
Os03g03034 VGAAACRSHGFFQVNLHGVPELTVSLVAVAHDFRLPAEEKAKLYSDDPARKIRLSTSFN 113  
AtDMR6 IHQACARFGFFQVINHGYNKQIIDEMVSVAREFFSMSMEKMKLYSDDPTKTTRLSTSFN 114  
                  : \*\* .\*\*\*:\*\*\*: : :. :. \*\* .: \*\*\* \*\*\*\*\*:.. \*\*\*\*\*

ZmFNSI-1 VRKETVHNWRDYLRLHCHPLDEFPLDWPSPNPPDFKETMGTYCKEVRELGFRLYAAISESL 173  
Os10g39140 VRKETVHNWRDYLRLHCHPLHQPVPDWPSPNPPSFKEIIGTYCTEVRELGFRLYEAISESL 179  
Os03g03034 VRKETVHNWRDYLRLHCHPLHRYLPDWPSPNPPSFREIISTYCKEVRELGFRLYGAISESL 173  
AtDMR6 VKKEEVNWRDYLRLHCHPIHKYVNEWSPNPPSFKEIVSKYSREVREVGFKIEELISESL 174  
                  \*:\*\* \*:\*\*\*\*\*:\*.:.: :\*\*\*\*\*.\*: \* ..\*. \*\*\*\*\*:\*\*:. \*\*\*\*\*

ZmFNSI-1 GLEASYMKEALGEQEQHMAVNFYPPCPEPELTYGLPAHTDPNALTILLMDPDVAGLQVLH 233  
Os10g39140 GLEGGYMRRTLGEQEQHMAVNFYPPCPEPELTYGLPAHTDPNALTILLMDQVAGLQVLN 239  
Os03g03034 GLEQDYIKKVLGEQEQHMAVNFYPPCPEPELTFGLPAHTDPNALTILLMDQVAGLQVLK 233  
AtDMR6 GLEKDYMKKVLGEQEQHMAVNFYPPCPEPELTYGLPAHTDPNALTILLQDQVAGLQVLI 234  
                  \*\*\* .:..:\*\*\* \*\*\*\*\*:\* \*\*\*\*\*:\*\*\*\*\* \* \*..\*\*\*:

ZmFNSI-1 AGQWVAVNPQPGALIIINIGDQLQALSNGQYRSVWHRAVVNSDRE~~RMS~~VASFLCPCNHVVL 293  
Os10g39140 DGKWIIVNPQPGALVINIGDQLQALSNGKYRSVWHRAVVNSDRE~~RMS~~VASFLCPCNSVEL 299  
Os03g03034 EGRWVAVNPQPNALVINIGDQLQALSNGRYKSVWHRAVVNSDRE~~RMS~~VASFLCPCNDVLI 293  
AtDMR6 DGQWFAVNPHPDAFVINIGDQLQALSNGVYKSVWHRAVTNTEN~~RLS~~VASFLCPADCAVM 294  
                  \*:\*..\*\*\*:\*.\*:\*\*\*\*\* \*:\*.....\*:.: .:\*\*\*\*\*:.. : :

ZmFNSI-1 GPARKLVTED---TPAVYRNYTYDKYYAKFWSRNLQEHCLFRT----- 336  
Os10g39140 GPAKKLITDD---SPAVYRNYTYDEYYKFFWSRNLQEHCLFRT----- 342  
Os03g03034 GPAQKLITDG---SPAVYRNYTYDEYYKFFWSRNLQEHCLFRTTPTDTS 342  
AtDMR6 SPAKPLWEAEDDETKPVYKDFTYAEYYKFFWSRNLQEHCLFNFLNN----- 341  
                  .\*: \* : .\*\*::\*\* :\*\* \*\*\*\*\* \* .

## B

PcFNS MAPTTITALAKEKTLNLDVFRDEDERPKVAYNQFSNEIPIISLAGLDDSDGRRPEICRK 60  
AgFNS MAPSTITALSQEKTNLNLDVFRDEDERPKVAYNQFSNEVPIISLAGLDDSDNGRRAEICRK 60  
DcFNS MAPTTITALAKEKTLNSDFVRDEDERPKVAYNQFSTEIPIISLAGIDDDSDNGRRPEVCRK 60  
CcFNS MAPTTITALAQEKTLNSDFVRDEDERPKVAYNQFSTEIPIISLAGIDDDSKGRRPEVCRK 60  
ZmFNSI-1 -MAEHLSTAVHDTLPGSYVRPEPERPRLAEVVTGARIPVVDLGSPP-----RGAVVAA 53  
                  . : : : ..\*\* .: \*\* \* \*\*\*:\*\* . . :\*:\*\*.. \* \* :

PcFNS IVKACEDWGFIFQVVDHGDIDSLISEMTRLSREFFALPAEEKLEYDITG-GKRGGFTISTV 119  
AgFNS IVEAFEWGFIFQVVDHGDIDSLISEMSRLSREFFALPAEEKLEYDITG-EKKGGFTISTH 119  
DcFNS IVEAFEDWGFIFQVVDHGDIDSLIAEMSRLSREFFALPAEEKLEYDITG-GKRGGFTISTH 119  
CcFNS IVEAFEDWGFIFQVVDHGDVDSALISEMSRLSREFFALPAEEKLEYDITG-GKRGGFTISTH 119  
ZmFNSI-1 VGDACRSHGFFQVNVHGIHAALVAAVMAAGRGFFRLPPEEKAKLYSDDPARKIRLSTSFN 113  
                  : . \* .. \*:\*\*\*:\*\*\*:..\*:.: : . \* \*\* \*.\*\*\* : . :. :. : \*

PcFNS LQGDDAMDWREFVTFYFSPINARDYSRWPKKPEGWRSTTEVYSEKLMVLGAKLLEVLSEA 179  
AgFNS LQGDDVDRWREFVTFYFSPISARDYSRWPKKPEGWRSTTEVYSEKLMVLGAKLLEVLSEA 179  
DcFNS LQGDDVDRWREFVTFYFSPVDARDYSRCPDKPEGWRSTTEVYSEKLMALGAKLLEVLSEA 179  
CcFNS LQGDDVDRWREFVTFYFSPVDARDYSRWPKEKPEGWRSTTEVYSEKLMVLGAKLLEVLSEA 179  
ZmFNSI-1 VRKETVHNWRDYLRLHCHPLDEFPLDWPSPNPPDFKETMGTYCKEVRELGFRLYAAISES 172  
                  : : . :\*\*::\* .:\*\*\*. \*:\* \* .:.. .\*:.: \*\* : \* .:\*\*\*:

PcFNS MGLEKGDLTACVDMEQKVLINYYPTCPQPDLTGVRRH~~HTD~~PGTITILLQD-MVGGLQAT 238  
AgFNS MGLEKEALTKACVEMEQQKVLINYYPTCEPDLTLGVRRH~~HTD~~PGTITILLQD-MVGGLQAT 238  
DcFNS MGLEKEALTEACVNMEQKVLINYYPTCPQPDLTGVRRH~~HTD~~PGTITILLQD-MVGGLQAT 238  
CcFNS MGLDKGALTKACVNMEQKVLINYYPTCEPDLTLGVRRH~~HTD~~PGTITILLQD-MVGGLQAT 238  
ZmFNSI-1 LGLEASYMKEALGEQEQHMAVNFYPPCPEPELTYGLPAHTDPNALTILLMDPDVAGLQVL 232  
                  \*:\*\* :.:\* : \*\*:.: \*.\*\*.\*:\*\*\* \* : \*\*\*\*\*:\*\*\*\*\* \* \*..\*\*\*.

```

PcFNS      RDGGKTWITVQPVEGAFVVNLGDHGHYLSNGRFRNADHQAVVNSTSSRLSSIATFQNPQN 298
AgFNS      RDGGKTWITVQPVEGAFVVNLGDHGHYLSNGRFRNADHQAVVNSTSTRLSSIATFQNPQN 298
DcFNS      RDGGKTWITVQPVEGAFVVNLGDHGHYLSNGRFRNADHQAVVNSTSSRLSSIATFQNPQN 298
CcFNS      RDGGKTWITVQPVEGVFVVNLGDHGHYLSNGRFRNADHQAVVNSTSSRLSSIATFQNPQN 298
ZmFNSI-1   HAG--QWVAVNPQPGALINIGDQLQALSNGQYRSVWHRAVVNSDRERMSSVASFLCPCNH 290
           : * *:::* * *:::***: : *****:.. *:***** *:***:* *:::

PcFNS      AIVYPL-KIREGEKAILDEAITYAEMYKCMTHKIEVATRKKLAKEKRLQDEKAKLEMKS 357
AgFNS      AIVYPL-KIREGEKAILDEAITYAEMYKKNMTKHIAVATQKKLAKEKRLQDEKAKMKI-- 355
DcFNS      AIVYPL-KIREGEKPILEEAMTYAEMYKKNMTKHIEVATQKKLAKEKRLQNEKAKLETKF 357
CcFNS      AIVYPL-KIREGEKPILEEAITYAEMYKKNMTKHIEVATQKKLAKEKRLQEEKAKLETKT 357
ZmFNSI-1   VVLGPARKLVTEDETPAVYRNYTYDKYYAKFWSRNLQEHCLELFRT----- 336
           .:: * * : .. : . ** : * * :::: :* :

```

Amino acid sequences alignment of the predicted *ZmFNSI-1* with FNS proteins from *O. sativa* and *A. thaliana* plants (A) and *Apiaceae* (B). The sequences were aligned using the Clustal W2 program. Dashes (-) indicate spaces introduced to promote optimal alignment, perfect matches are indicated by an asterisk (\*), high amino-acid similarities by double dots (:), and weak similarities by a single dot (.). Amino acids coordinating the ferrous iron and residues participating in 2-oxoglutarate binding are in bold-underlined and bold letters, respectively.

# Supplemental Fig. S3

A

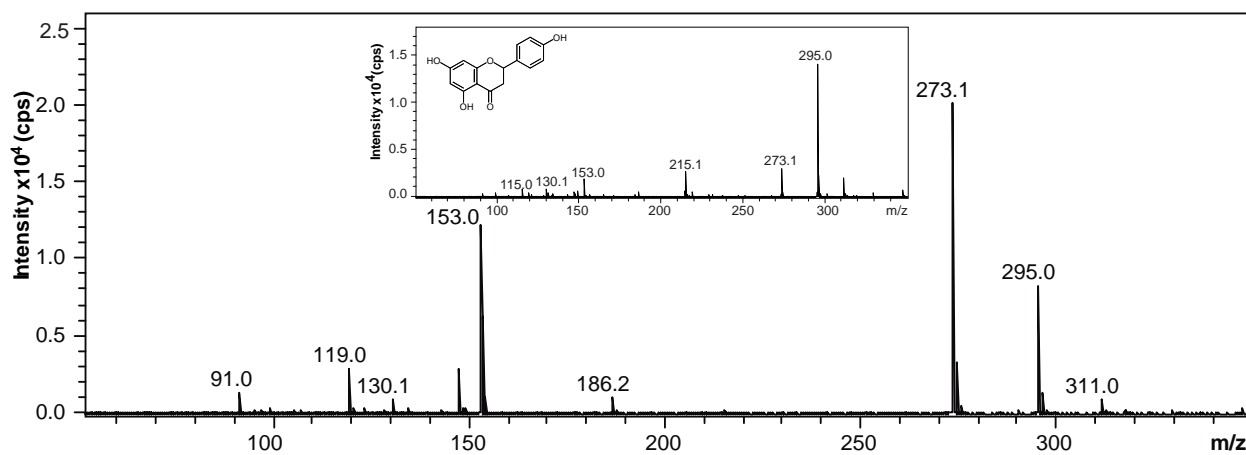

B

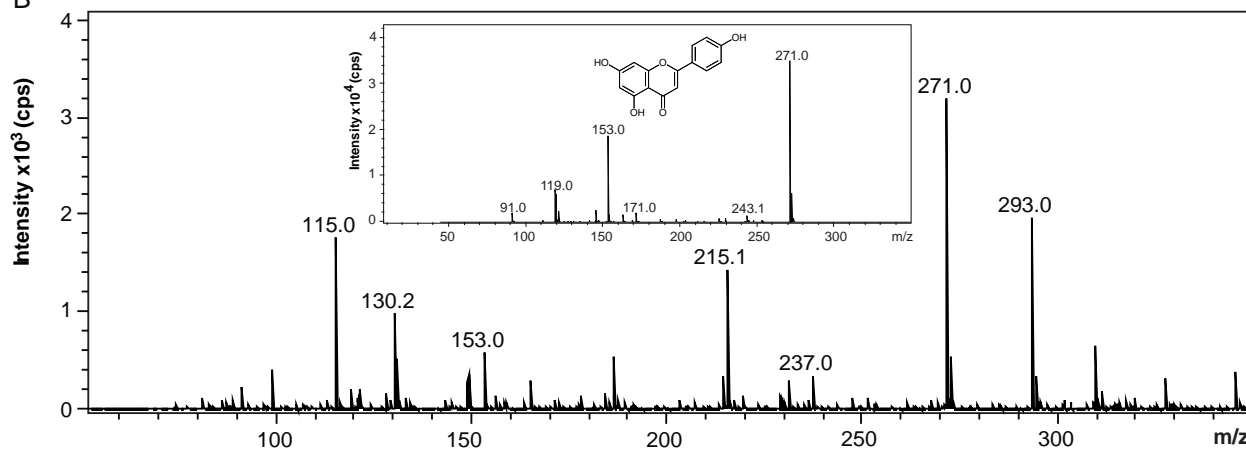

LC-MS analysis of *ZmFNSI-1* activity products in *E. coli* bioconversion assays using naringenin as a substrate. Fragmentation of the naringenin substrate (A) and apigenin (B) produced by *ZmFNSI-1*. For comparison, the fragmentation patterns of the standards are shown on the middle top. Naringenin and apigenin produced molecular ions of  $m/z = 273$  and 271, respectively.

## Supplemental Fig. S4

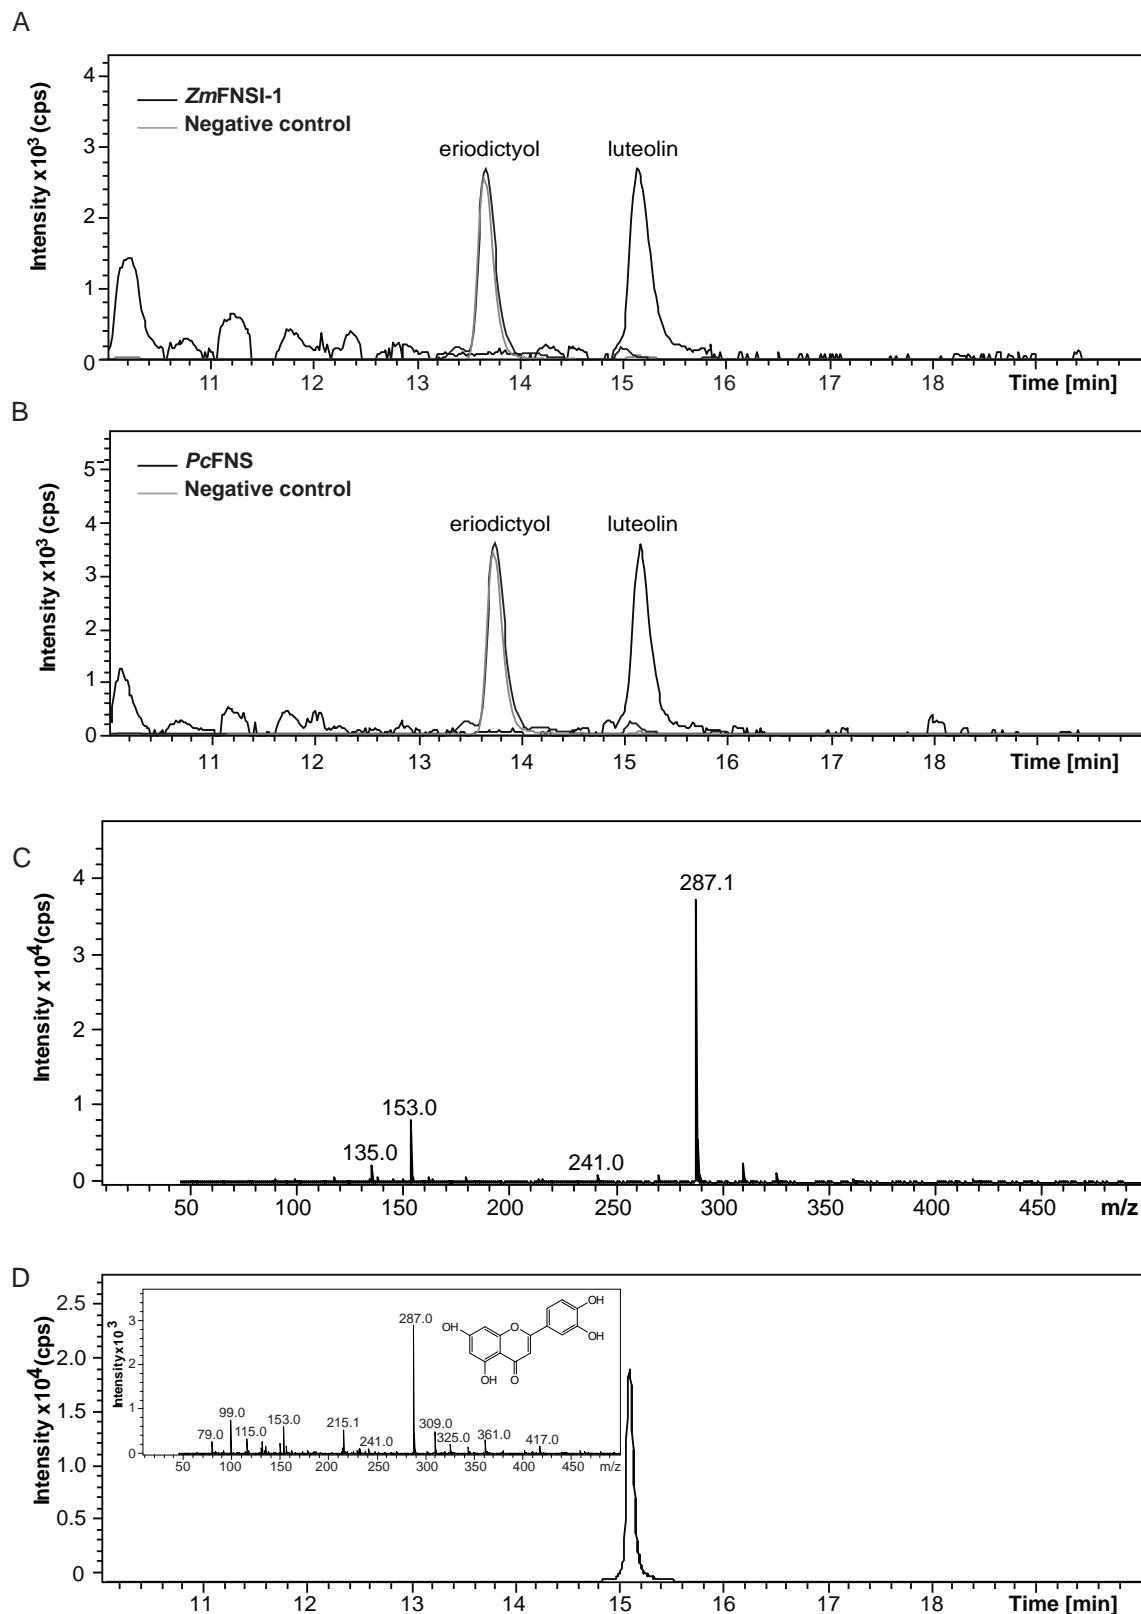

LC-MS analysis of *ZmFNSI-1* activity assayed with eriodictyol as a substrate. (A) Representative ion chromatogram for eriodictyol bioconversion in *E. coli* expressing *ZmFNSI-1*. The reaction products generated a molecular ion of  $m/z = 287$  corresponding to luteolin, while *E. coli* cells transformed with the empty vector did not show the production of the product. (B) Representative ion chromatogram for eriodictyol bioconversion in *E. coli* expressing *PcFNS* as a positive control. (C). MS/MS fragmentation profile of the product of the *ZmFNSI-1* activity assay. (D) A luteolin standard was used as a control, its MS/MS fragmentation profile corresponds to that of the *ZmFNSI-1* reaction product, which is shown inside the graph.

## Supplemental Fig. S5

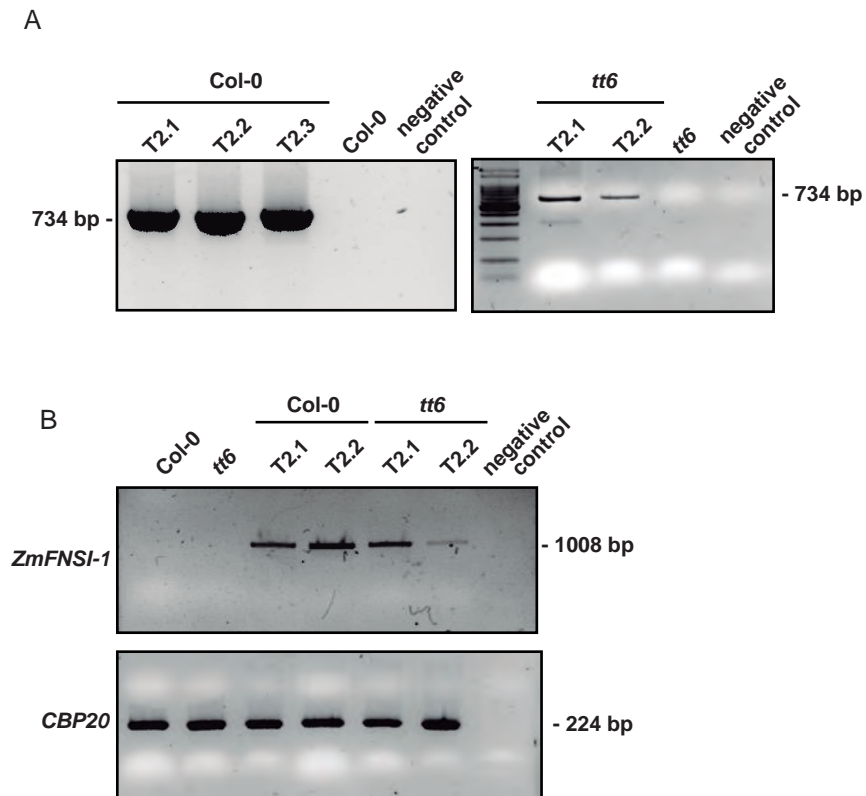

Presence and expression of the *ZmFNSI-1* transgene in transformed *A. thaliana* plants. (A) Amplification of the *ZmFNSI-1* transgene by PCR on genomic DNA from 15-days-old hygromycin-resistant plants transformed with the p35S::*ZmFNSI-1* construct (3 lines in Col-0 background (T2.1, T2.2 and T2.3 lines) and 2 lines in *tt6* background (T2.1 and T2.2)). Positive PCR reaction amplified a 734 bp product (35 cycles). DNA from non-transformed Col-0 and *tt6* mutant plants was used as negative controls for amplifications. Also, the PCR reaction was done without genomic DNA as a different negative control. (B) *ZmFNSI-1* mRNA levels in 15-days-old hygromycin-resistant Arabidopsis lines transformed with p35S::*ZmFNSI-1* determined by RT-PCR, which amplifies a product of 1008 bp (35 cycles). CBP20 was used as an internal control. cDNA from non-transformed Col-0 and *tt6* mutant plants was used as negative controls for amplifications. Also, the RT-PCR reaction was done without template as a different negative control.

## Supplemental Figure S6

GAGAGTTTGTGCTTGTCACTC TTGTTGATCGACATCACCTAAACGACTTGGTAGCGACCGAGAGTTTGTG  
ATCACCTGTTGAAGATTGTGGATGGTCTAACTAATGCTTAAACGACTACGGGGTAATTCATCGTGCTGGAG  
TGACGAAGAATGAATCTATACTTGATCCTTACGCAGATCAAGAAAGAGTCTCACCCCTTGTGTGGATGCTCC  
AACGAGGACTACTAATTTAGTCTCTAAATTGCCAAATACGAAAATTTAAACTCTATTTTTATTTTCTGTATT  
TGGCAACTCAGTGACTAAAATGAAATAAAATAGATGGACTAAAAATTAGTCCCTAGAAACCAAACAACCTCC  
TTAGTCTATTTTTCCATCAAACGTAGATGGCCTTTAAAAAAGATGCAACC TTCTTTAGCCTTATAGAAATA  
TTCCCTCTATCCTAATATATAAAGCGTAACCACGATCTGATTCAAATATAAAAAATAAATTTAATTCTCT  
CTATCAACACTAATACTACTGCATTGATTTACGTATGTCTAGATATAGCATGCTTTATAATATGATACTAG  
AATAAAATATGATAGGACTGGCGGAGGGCAGTAACTTATAGTAATGTAAAGTAAGGAGCAAATTGTGCGGG  
GTTTCGACACATGGAATTGCTTCGTGGTCCCAATTAGAAAACATGAAAAATATCCTGGTGTCCCTCCAAAAG  
CAGAAGGGAAACTCGAGTGTGTTGAACAAGCATGGGATGGAATCGATTGGCACACGGCGACTTGGCGAGGAA  
ACGTTAGCCATCCATTGTGCGAAAAGCTCGCAATCGCAATGCGCCAGATTCTCGAGTAACGAAATCGCGGA  
TCCACATTGCGCGTGGACCACCGCATAACAATGGTTGG TTCCCGTGTACGCCGTGATACAGCAGAGCACGT  
GGACGTGGATCTGATTGGACTTGGTTGG TGGTGCACCCGACCGATGTTGCGTGCACGAGACATCCTCGCAC  
GACGGGAATCCGCCGCTCTGGCAAGCCACTCTGTCTATGTGCCTCTTGGATCCTGCGATCCGCCGCTGGAG  
CGTAACCACCGCGTCCACATGCTGCTTCATTGGTGCCGGCGCGGAGGCTGCTTAGCTCGCCGCCGAGGGAC  
TACTTTGCCCGCCACGGTTACGGCGTGATGCGGAGGGTGGTGACGTCACTCACCGCCACGGCGATGACGC  
GAGGGGATATCAGTCATCAGTCCACCCAACGACCGCGGGGGTCAACC TCTTCTCGGTGCTCGTCGCGTCTG  
TCACGGCTGACGCCACGGGCCCCGCTGCCTGCCGGAACGCCACGCCGAGCCACGGCGCAGTCACCACCAGA  
CATCAAGTTACGCGTCCGGCTTCCC GGCCGCTATAAAGAGCGCGGACGGCGGCCCTGGGAGAGCCATGC  
GAGACTGGAGGGCGGAACCGCGCACGACACCAAGCTGCCGCGCCGGACTGCTGCACGCAAGCGCAGCGCAGG  
ACCGACCGACCTCCGTAGGCACGCACGGCGCCGGCGGC

*ZmFNSI-1* promoter sequence from the B73 maize line. The promoter region shown ranges from -1426 to +103 bp. C1/P1 binding sites and E-box are highlighted in red and grey, respectively. The 5'UTR region is indicated in red color. Primers used for PCR are highlighted in yellow.

## Supplemental Fig. S7

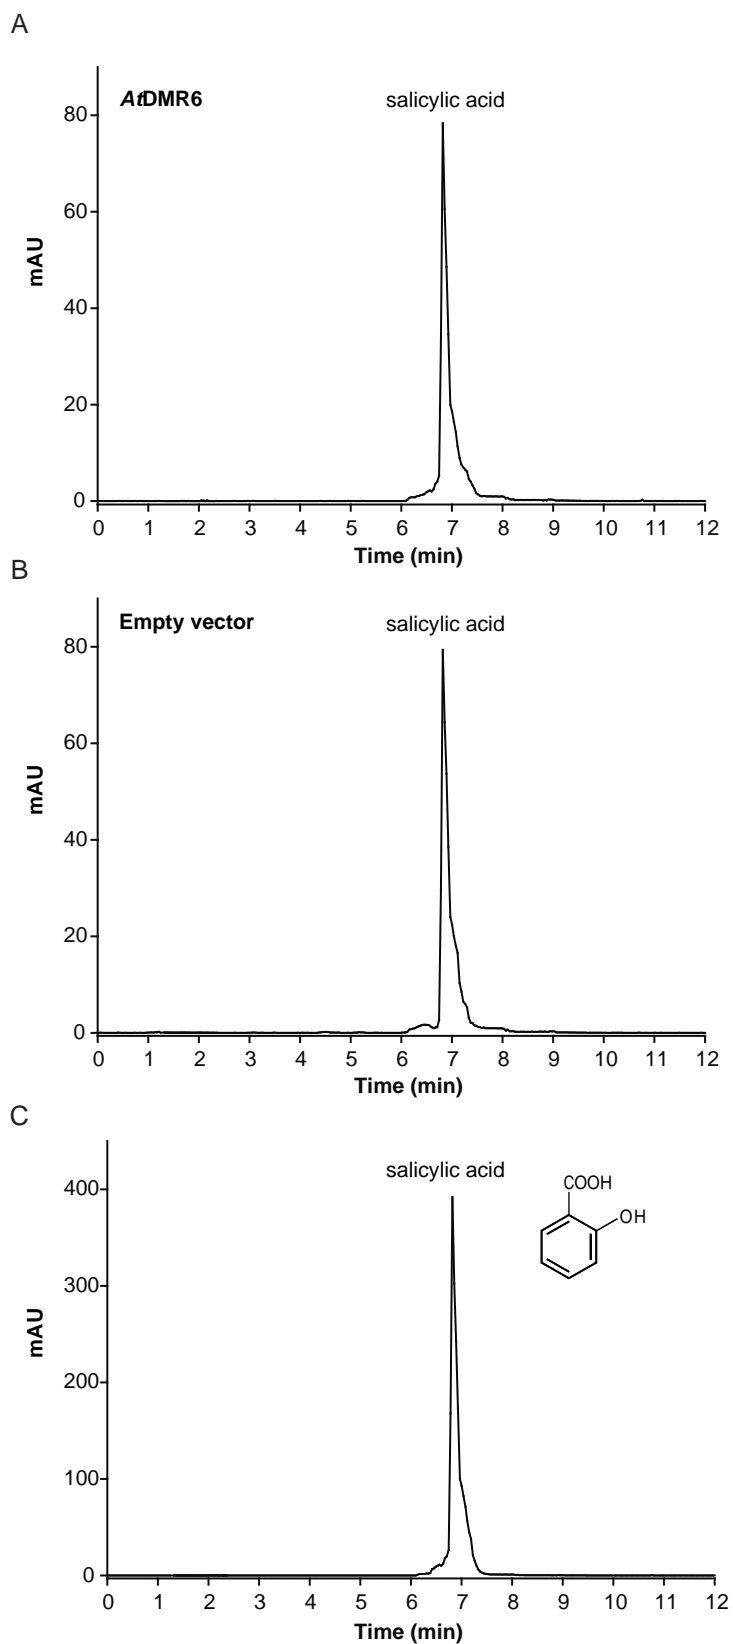

*In vitro* AtDMR6 activity assayed with salicylic acid as a substrate. (A) HPLC profile of purified His6-AtDMR6 activity assay using salicylic acid as a substrate, the reaction did not generate any hydroxylated product. (B) A negative control using an *E.coli* extract transformed with an empty vector did not show any product. (C) HPLC profile of a salicylic acid standard.



# Supplemental Fig. S8

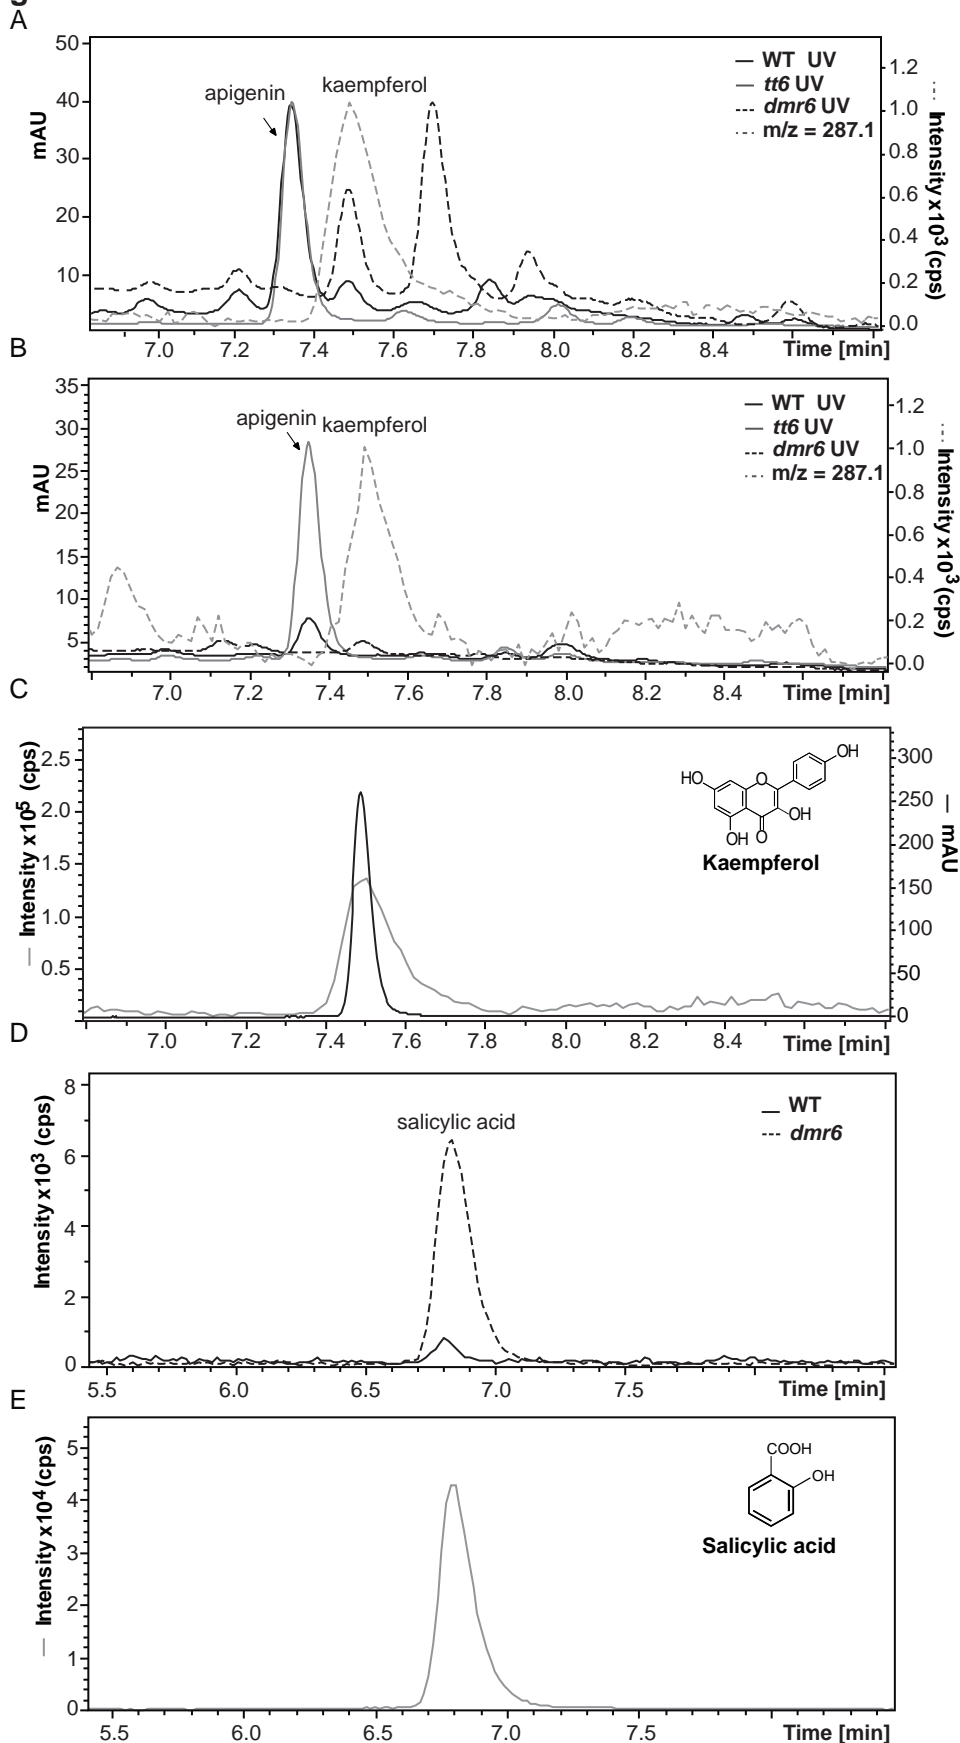

Accumulation of kaempferol, apigenin and salicylic acid in Arabidopsis. (A) UV and ion chromatogram profiles of hydrolyzed flavonoids of cauline leaves from WT, *tt6* and *dmr6* Arabidopsis mutant plants analyzed by LC-MS/MS showing the molecular ion of *m/z* = 287 in WT and *dmr6* mutant plants that corresponds to kaempferol. The peak at 7.35 min that corresponds to apigenin is also indicated. (B) UV and ion chromatogram profiles of hydrolyzed flavonoids of senescing leaves from WT, *tt6* and *dmr6* Arabidopsis mutant plants analyzed by LC-MS/MS showing the molecular ion of *m/z* = 287 in *dmr6* mutant plants that corresponds to kaempferol. The peak at 7.35 min that corresponds to apigenin is also indicated. (C) UV and ion chromatogram of kaempferol standard. (D) Ion chromatogram profiles of hydrolyzed flavonoids of cauline leaves from WT, and *dmr6* Arabidopsis mutant plants LC-MS/MS showing the molecular ion of *m/z* = 137 that corresponds to salicylic acid (negative ion chromatogram). (E) Negative ion chromatogram of salicylic acid standard.

## Supplemental Fig. S9

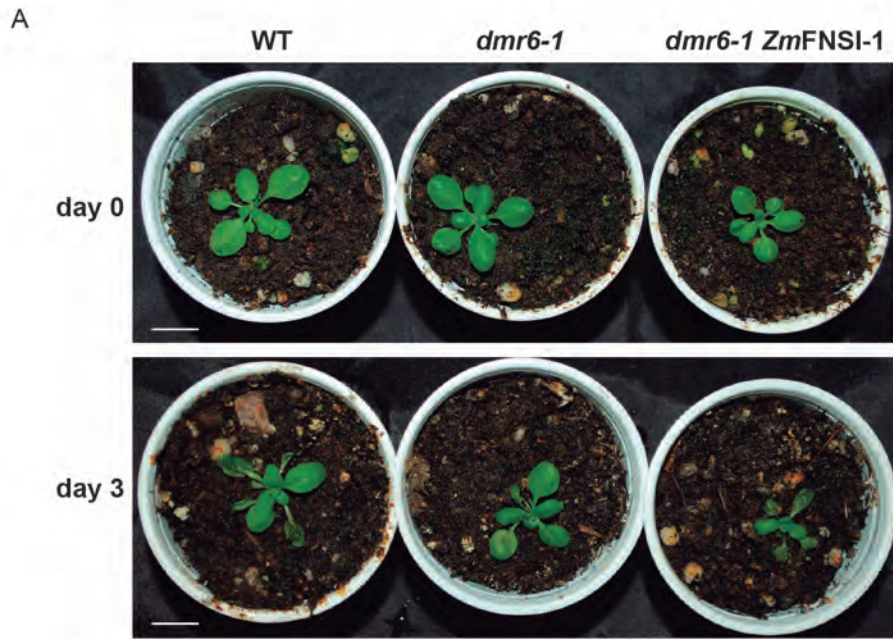

B

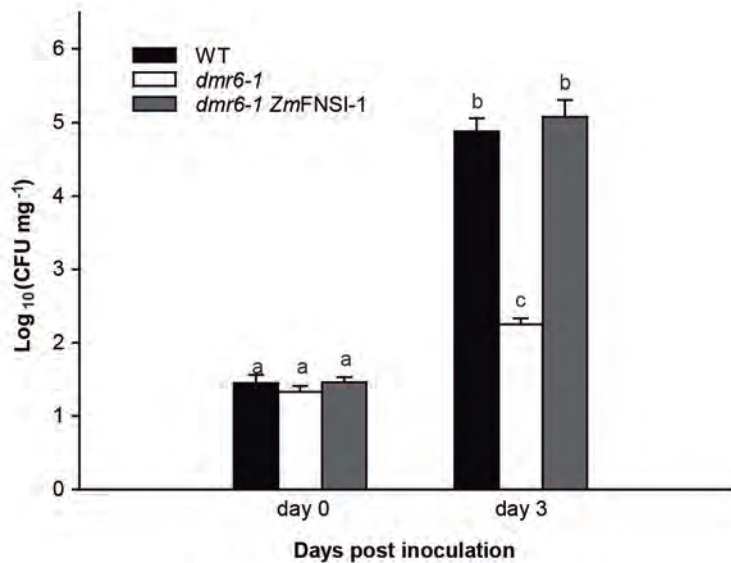

*ZmFNSI-1* complements susceptibility of *Arabidopsis dmr6-1* mutant plants towards *P. syringae* pv. *tomato* DC3000 (*Pst*). (A) Disease symptoms of WT plants, *dmr6-1* mutants and *dmr6-1* transformants expressing *ZmFNSI-1*, 0 and 3 days after *Pst* infection. Scale bar: 1 cm. (B) Leaf bacterial count at 0 and 3 days post infection (colony-forming units per mg of leaf tissue). A bacterial suspension with OD 0.05 was sprayed on the plants. Data show mean values  $\pm$  S.E.M of three biological repeats. Different letters over the bars indicate statically significant differences with  $P < 0.01$  (ANOVA test).

**Supplemental Table S1.** Substrates tested in bioconversion assays in *E. coli* expressing *ZmFNSI-1* and *AtDMR6* and *in vitro* assays with the recombinant proteins. Product formation is indicated for each compound tested.

| <b>Compound</b>   | <b>Type</b>        | <b>Activity</b>              | <b>Product formation</b> |
|-------------------|--------------------|------------------------------|--------------------------|
| dihydroquercetin  | dihydroflavonol    | flavonol synthase            | not detected             |
| dihydrokaempferol | dihydroflavonol    | flavonol synthase            | not detected             |
| leucocyanidin     | leucoanthocyanidin | anthocyanidin synthase       | not detected             |
| salicylic acid    | phenolic acid      | salicylic acid 3-hydroxylase | not detected             |
| naringenin        | flavanone          | flavanone 3-hydroxylase      | not detected             |
| eriodictyol       | flavanone          | flavanone 3-hydroxylase      | not detected             |
| naringenin        | flavanone          | flavone synthase             | apigenin                 |
| eriodictyol       | flavanone          | flavone synthase             | luteolin                 |

**Supplemental Table S2.** Primers used for cloning\*, RT-qPCR and screening.

| <b>Name</b>                | <b>Sequence</b>                                    |
|----------------------------|----------------------------------------------------|
| <i>ZmFNSI-F</i>            | 5' CACCATGGCGGAGCACCTCCTG3'                        |
| <i>ZmFNSI-R1</i>           | 5' GGTTCTGAAGAGCTCGAGGCA3'                         |
| <i>ZmFNSI-F-RT</i>         | 5'AGGAGAAGGCCAAGCTCTACT3'                          |
| <i>ZmFNSI-R-RT</i>         | 5'CCCATGGTCTCCTTGAAATC3'                           |
| <i>ZmFNSI-NdeI-F</i>       | 5'ACAG <u>CATATGGCGGAGCACCTCCTGT</u> CGAC3'        |
| <i>ZmFNSI-BamH-R</i>       | 5'TGTCAG <u>GATCCTCAGGTTCTGAAGAGCTCG</u> 3'        |
| <i>AtDMR6-NdeI-F</i>       | 5'ACAG <u>CATATGGCGGCAAAGCTGATATCCACCGG</u> T3'    |
| <i>AtDMR6-BamH-R</i>       | 5'TGTCAG <u>GATCCTTAGTTGTTTAGAAAATTCTCGAGGC</u> 3' |
| <i>ZmFNS1-Kpn-prom-R2</i>  | 5'CATA <u>GGTACCGCCGCCGGCGCCGTGCGT</u> G3'         |
| <i>ZmFNS1-NotI-prom-F2</i> | 5'CAC <u>CGCGGCCGCGAGAGTTTGTGCTTGTCACTC</u> 3'     |
| <i>ZmActin1-F</i>          | 5'CTTCGAATGCCCAGCAAT3'                             |
| <i>ZmActin1-R</i>          | 5'CGGAGAATAGCATGAGGAAG3'                           |
| <i>AtCBP20-F</i>           | 5'CCGGCCTATTCGTGTGGATTTTGA3'                       |
| <i>AtCBP20-R</i>           | 5'CATAATTCGTTGGCGCAGCTTGAG3'                       |
| <i>AtUBQ10-F</i>           | 5'AAGCAGCTTGAGGATGGAC3'                            |
| <i>AtUBQ10-R</i>           | 5'AGATAACAGGAACGGAAACATAGT3'                       |
| <i>AtDMR6-F-RT</i>         | 5'ATCTTTGGCCTTTGTGTTT3'                            |
| <i>AtDMR6-R-RT</i>         | 5'CAAACACAAAGGCCAAAGAT3'                           |

\*The restriction enzyme recognition sequences are underlined in primer sequences
